# Supplementary material for: The impact of a multidisciplinary team approach on the management of focal pancreatic lesions: a single tertiary center experience
Source: PubMed Central journal article supplement — Ann Gastroenterol. 2023 Jul 25;36(5):580–7. doi: 10.20524/aog.2023.0827 (PMC10433261; doi:10.20524/aog.2023.0827), 2023-07-25
Supplement: AnnGastroenterol-36-580_Suppl1.pdf [file AnnGastroenterol-36-580_Suppl1.pdf]

## Supplementary material

**Supplementary Table 1** Impact of multidisciplinary team discussion on patient management: cystic vs. solid lesions

| Management approach   | Management of cystic lesions before MDT | Management of cystic lesions after MDT | P-value | Management of solid lesions before MDT | Management of solid lesions after MDT | P-value |
|-----------------------|-----------------------------------------|----------------------------------------|---------|----------------------------------------|---------------------------------------|---------|
| None, %               | 43.8                                    | 5.9                                    | <0.001  | 26.7                                   | 2.1                                   | <0.001  |
| Chemotherapy, %       | 0.5                                     | 6.5                                    |         | 24.6                                   | 53.7                                  |         |
| Surgery, %            | 4.3                                     | 8.1                                    |         | 12.2                                   | 12.5                                  |         |
| Imaging follow-up, %  | 28.6                                    | 48.1                                   |         | 5                                      | 7.7                                   |         |
| Clinical follow-up, % | 14.1                                    | 21.1                                   |         | 2.1                                    | 7.7                                   |         |
| Endoscopy, %          | 8.6                                     | 1.1                                    |         | 27.6                                   | 2.7                                   |         |
| Radiotherapy, %       | 0                                       | 0.5                                    |         | 1.2                                    | 5.6                                   |         |
| Palliative care, %    | 0                                       | 1.1                                    |         | 0                                      | 2.7                                   |         |
| Other, %              | 0                                       | 7.6                                    |         | 0.6                                    | 5.3                                   |         |

MDT, multidisciplinary team

**Supplementary Table 2** Impact of multidisciplinary team discussion on patient diagnosis: cystic vs. solid lesions

| Diagnosis                                | Diagnosis of cystic lesions before MDT | Diagnosis of cystic lesions after MDT | P-value | Diagnosis of solid lesions before MDT | Diagnosis of solid lesions after MDT | P-value |
|------------------------------------------|----------------------------------------|---------------------------------------|---------|---------------------------------------|--------------------------------------|---------|
| Adenocarcinoma, %                        | 0                                      | 7.6                                   | NS      | 74.2                                  | 74.8                                 | NS      |
| IPMN, %                                  | 7.6                                    | 50.3                                  |         | 1.8                                   | 2.4                                  |         |
| NET, %                                   | 1.6                                    | 3.8                                   |         | 11.6                                  | 10.1                                 |         |
| Serous cystadenoma, %                    | 11.4                                   | 16.2                                  |         | 0.6                                   | 0.6                                  |         |
| Mucinous cystadenoma, %                  | 9.2                                    | 6.5                                   |         | 0.3                                   | 0                                    |         |
| Cholangiocarcinoma, %                    | 0                                      | 0                                     |         | 2.7                                   | 2.7                                  |         |
| Cystic dystrophy of the duodenal wall, % | 2.2                                    | 2.2                                   |         | 0                                     | 0                                    |         |
| Ampulloma %                              | 0                                      | 0                                     |         | 2.1                                   | 1.5                                  |         |
| Unknown, %                               | 15.1                                   | 2.2                                   |         | 1.2                                   | 0                                    |         |
| Other, %                                 | 5.4                                    | 11.4                                  |         | 5.6                                   | 8                                    |         |

MDT, multidisciplinary team; IPMN, intraductal papillary mucinous neoplasm; NET, neuroendocrine tumor; NS, non significant
